# Supplementary material
Source: HighWire-hosted journal article supplement (https://diabetes.diabetesjournals.org/content/suppl/2002/11/12/51.11.3176)
Supplement: Supplemental_Fat_1D_induced_db02_454.pdf [file Supplemental_Fat_1D_induced_db02_454.pdf]

TNF\_induced genes, fat tissue, 1 day infusion

| Description                                                     | Accession | Fold |
|-----------------------------------------------------------------|-----------|------|
| <b>Apoptosis</b>                                                |           |      |
| bax (apoptosis inducer)                                         | S76511    | 1.6  |
| nuclear oncoprotein p53                                         | X13058    | 2.1  |
| <b>Blood Coagulation</b>                                        |           |      |
| plasminogen activator receptor 2 (urokinase receptor)           | X71898    | 1.9  |
| <b>Cell Adhesion</b>                                            |           |      |
| Ninjurin                                                        | U72660    | 1.8  |
| Vascular cell adhesion molecule 1                               | X63722    | 2.3  |
| tenascin                                                        | U09361    | 3.1  |
| intercellular adhesion molecule-1                               | D00913    | 2.3  |
| <b>Cell Motility</b>                                            |           |      |
| bithoraxoid-like protein (dynein light chain)                   | AF073839  | 1.6  |
| moesin (membrane-organizing extension spike protein)            | AF004811  | 2.8  |
| <b>Cell Signaling</b>                                           |           |      |
| acid phosphatase                                                | AI234950  | 1.6  |
| beta-adrenergic receptor kinase                                 | S48813    | 1.6  |
| beta-arrestin2                                                  | M91590    | 1.8  |
| brain sigma receptor                                            | AF004218  | 1.6  |
| C5a receptor                                                    | AB003042  | 2.3  |
| calmodulin (pRCM1)                                              | X13933    | 1.5  |
| CD14                                                            | AF087943  | 1.9  |
| coronin-like protein                                            | AJ006064  | 1.5  |
| cyclase-associated protein homologue (MCH1, CAP)                | L11930    | 2    |
| epithelial cell transmembrane protein antigen precursor (RTI40) | U92081    | 2    |
| FK506-binding protein 1 (12kD)                                  | AI228738  | 1.5  |
| G alpha interacting protein (GAIP)                              | AF068136  | 1.7  |
| G protein alpha 12 subunit                                      | S50461    | 1.5  |
| G protein coupled receptor                                      | D38450    | 1.5  |
| inositol polyphosphate 5' phosphatase Ship (SHIP)               | U55192    | 1.6  |
| lyn A protein tyrosine kinase                                   | L14782    | 2.6  |
| NMDA receptor                                                   | S39221    | 2    |
| P2x4 ATP receptor                                               | U47031    | 1.5  |
| phosphodiesterase I                                             | D30649    | 2    |
| phospholipase A2                                                | U38376    | 1.6  |
| phospholipase A2 precursor                                      | X51529    | 2.6  |
| platelet-activating factor receptor                             | U04740    | 1.7  |
| Protein 9 Ka homologous to calcium-binding protein              | X06916    | 1.7  |
| protein-tyrosine phosphatase (SHP-1)                            | U77038    | 1.7  |
| RAB8 mRNA                                                       | M83675    | 1.8  |
| S100 calcium binding protein A9 (MRP14)                         | L18948    | 7    |
| S6 protein kinase (Rsk-1)                                       | M99169    | 1.6  |
| Spleen tyrosine kinase                                          | U21683    | 1.8  |
| tyrosine kinase (hck)                                           | S74141    | 3.3  |
| protein kinase C delta                                          | M18330    | 2    |

|                                                              |          |     |
|--------------------------------------------------------------|----------|-----|
| <b>Cell Stress</b>                                           |          |     |
| Hsp70/Hsp90 organizing protein                               | Y15068   | 1.5 |
| stress-associated endoplasmic reticulum protein 1 (SERP1)    | AF100470 | 1.6 |
| superoxide dismutase, manganese-containing (MnSoD)           | Y00497   | 2.4 |
| <b>Cell Structure and Cytoskeleton</b>                       |          |     |
| class I beta-tubulin                                         | AB011679 | 1.7 |
| cofilin                                                      | AI105348 | 1.5 |
| desmin                                                       | X73524   | 5.5 |
| nonmuscle myosin heavy chain-A                               | U15764   | 1.7 |
| p41-Arc (activity regulated cytoskeletal-associated protein) | AF083269 | 1.9 |
| slow-twitch alpha tropomyosin/hTMnm homolog                  | S82383   | 1.6 |
| Tropomyosin 4                                                | J02780   | 1.7 |
| <b>Nuclear Chaperone</b>                                     |          |     |
| Nucleoplasmin-related protein (Nuclear protein B23)          | J04943   | 1.6 |
| <b>Chemokine</b>                                             |          |     |
| glycoprotein 55 (stromal cell derived factor receptor 1)     | X99337   | 1.6 |
| <b>Cytokine and Receptors</b>                                |          |     |
| transforming growth factor-beta 1.                           | X52498   | 2.9 |
| interferon gamma receptor                                    | U68272   | 1.6 |
| interleukin-3 receptor beta-subunit                          | S79263   | 1.5 |
| interleukin 2 receptor beta chain                            | M55050   | 2.3 |
| interleukin 1 receptor type 2                                | Z22812   | 4.3 |
| <b>Cytokine Synthesis</b>                                    |          |     |
| interleukin-1 beta converting enzyme (IL1BCE)                | U14647   | 1.8 |
| TNF-alpha converting enzyme (TACE)                           | AJ012603 | 1.7 |
| <b>DNA Synthesis</b>                                         |          |     |
| CDC46 protein (EST similar to)                               | AA859768 | 1.9 |
| CDC47 (EST similar to)                                       | AA858636 | 1.6 |
| DNA polymerase alpha subunit II                              | AJ011606 | 1.6 |
| DNA polymerase alpha subunit IV (primase)                    | AJ011608 | 1.7 |
| DNA topoisomerase II                                         | AI639012 | 1.6 |
| intestinal DNA replication protein mRNA                      | U17565   | 1.7 |
| <b>Immune Response</b>                                       |          |     |
| class III Fc-gamma receptor                                  | M32062   | 2.3 |
| complement component C3 mRNA                                 | M29866   | 3.5 |
| leukocyte common antigen (L-CA)                              | M10072   | 2.4 |
| Ly6-C antigen                                                | M30691   | 1.8 |
| Lysozyme                                                     | AA892775 | 1.7 |
| macrophage migration inhibitory factor (Mif)                 | AI009801 | 1.7 |
| MHC class I antigen gene (RT1-u haplotype)                   | M64795   | 1.5 |
| MHC class I truncated cell surface antigen                   | M10094   | 1.7 |
| MHC class Ib antigen (RT1.CI) gene                           | AF025308 | 1.5 |
| MHC class Ib antigen RT1.M5 gene (RT1.M5-1 allele)           | AF055667 | 1.5 |
| MHC class Ib RT1                                             | U16025   | 1.6 |
| MHC class Ib RT1.S3 (RT1.S3) gene                            | AF029240 | 1.7 |
| monocyte differentiation antigen CD14                        | AF087944 | 1.9 |

|                                                                 |          |     |
|-----------------------------------------------------------------|----------|-----|
| ryudocan (heparan sulfate proteoglycan core protein)            | S61868   | 1.6 |
| DORA protein                                                    | AJ223184 | 4.5 |
| Mx1 protein (myxovirus resistance protein 1)                    | X52711   | 1.8 |
| CD 53 (leukocyte antigen OX44)                                  | M57276   | 2.2 |
| <b>Inflammatory Response</b>                                    |          |     |
| prostacyclin synthase (ratpgis)                                 | U53855   | 1.5 |
| surface protein MCA-32 (MCA-32)                                 | U39546   | 2   |
| five-lipoxygenase activating protein (FLAP)                     | X52196   | 1.7 |
| <b>Lysosomal Membrane Protein</b>                               |          |     |
| sialoglycoprotein of 85kDa (LGP85); collagen type I receptor    | D10587   | 1.5 |
| <b>Metabolism</b>                                               |          |     |
| <b>Glucose Metabolism</b>                                       |          |     |
| phosphofruktokinase                                             | X58865   | 1.8 |
| aldolase A                                                      | U20643   | 1.8 |
| phosphoglycerate kinase                                         | M31788   | 1.6 |
| phosphoglycerate mutase type B subunit                          | S63233   | 1.5 |
| enolase                                                         | X02610   | 1.5 |
| glucose-6-phosphate dehydrogenase                               | X07467   | 1.4 |
| Pyruvate kinase, muscle                                         | AA818951 | 1.6 |
| glycogenin                                                      | L01793   | 1.8 |
| <b>Fatty Acid and Lipid Metabolism</b>                          |          |     |
| fatty acid-binding protein (c-FABP)                             | S69874   | 1.6 |
| acyl-CoA hydrolase                                              | D88890   | 1.4 |
| acyl-CoA synthetase 5 (ACS 5)                                   | AB012933 | 1.4 |
| carnitine palmitoyltransferase I                                | L07736   | 1.4 |
| lysosomal acid lipase (intracellular hydrolase)                 | S81497   | 1.7 |
| phosphatidate phosphohydrolase type 2                           | AI230354 | 2.2 |
| myo-inositol monophosphatase 2 (EST similar to)                 | AA859981 | 1.6 |
| phosphatidylinositol transfer protein                           | M25758   | 1.5 |
| <b>Amino Acid Metabolism</b>                                    |          |     |
| argininosuccinate lyase                                         | D13978   | 1.9 |
| argininosuccinate synthetase                                    | X12459   | 3   |
| arylamine N-acetyltransferase                                   | U01347   | 2.2 |
| homocysteine respondent protein HCYP2                           | AF036537 | 1.9 |
| iodothyronine 5'-monodeiodinase (5'-MD)                         | M21476   | 1.6 |
| Catecholamine-O-methyltransferase                               | M60753   | 2.9 |
| cathechol-O-methyltransferase                                   | M93257   | 2.1 |
| <b>Cholesterol Metabolism</b>                                   |          |     |
| 3-hydroxy 3-methylglutaryl coenzyme A synthase (EC 4.1.3.5)     | X52625   | 1.6 |
| farnesyl diphosphate synthase                                   | M89945   | 2   |
| farnesyl pyrophosphate synthetase                               | AI180442 | 1.8 |
| lanosterol 14-alpha-demethylase                                 | AA963449 | 1.9 |
| steroidogenic acute regulatory protein                          | AB001349 | 2.6 |
| <b>Nucleotide Metabolism</b>                                    |          |     |
| 2',3'-cyclic nucleotide 3'-phosphodiesterase (CNPII) mRNA       | L16532   | 1.8 |
| 5-aminoimidazole-4-carboxamide ribonucleotide formyltransferase | D89514   | 1.6 |

|                                                                      |          |      |
|----------------------------------------------------------------------|----------|------|
| ADP-ribosylarginine hydrolase                                        | M86341   | 1.5  |
| ATP synthase subunit c                                               | D13123   | 1.5  |
| GTP cyclohydrolase I (EST similar to)                                | AA859496 | 1.6  |
| GTP cyclohydrolase I feedback regulatory protein                     | U85512   | 1.5  |
| guanosine-3-phosphate binding protein (low molecular weight)         | E03859   | 1.6  |
| nucleoside diphosphate kinase beta isoform                           | AI233173 | 1.6  |
| <b>Hemoglobin Metabolism</b>                                         |          |      |
| alpha-2u globulin-related protein                                    | AA946503 | 2.2  |
| UDP glucuronosyltransferase                                          | D38062   | 1.5  |
| <b>Other</b>                                                         |          |      |
| Metallothionein                                                      | M11794   | 1.9  |
| Retinol-binding protein 1                                            | M19257   | 2.6  |
| <b>Mitochondrial Function</b>                                        |          |      |
| cytochrome b558 alpha-subunit                                        | U18729   | 3    |
| cytochrome P-450 isozyme 5 (P450 IVB2)                               | M29853   | 3.9  |
| Cytochrome P450 1b1                                                  | U09540   | 10.3 |
| <b>mRNA processing</b>                                               |          |      |
| polypyrimidine tract binding protein (TBF II)                        | X74565   | 1.5  |
| nuclear import/export protein                                        |          |      |
| Importin beta                                                        | L38644   | 1.8  |
| major vault protein                                                  | U09870   | 1.6  |
| <b>Other</b>                                                         |          |      |
| growth and transformation-dependent protein                          | M17412   | 1.8  |
| hypertension-related mRNA                                            | U57050   | 1.5  |
| isoprenylated 67 kDa protein                                         | M80367   | 3.6  |
| liver mRNA                                                           | U96490   | 1.7  |
| p34 protein                                                          | D13623   | 1.5  |
| acidic membrane protein of rat brain (NAP-22)                        | D14441   | 1.5  |
| <b>Protein Degradation</b>                                           |          |      |
| metalloendopeptidase                                                 | M61142   | 1.6  |
| serine proteinase inhibitor                                          | AA875037 | 2.4  |
| Zn-peptidase aminopeptidase N                                        | M25073   | 2    |
| cathepsin C (dipeptidyl-peptidase I)                                 | D90404   | 2    |
| proteasomal ATPase (Tat-binding protein7)                            | D50695   | 1.5  |
| proteasome activator rPA28 subunit beta                              | D45250   | 1.9  |
| proteasome subunit R-DELTA                                           | D10754   | 1.6  |
| proteasome subunit R-IOTA                                            | D10755   | 1.5  |
| proteasome subunit R-RING12                                          | D10757   | 2.3  |
| proteasome subunit R-ZETA                                            | D10756   | 1.6  |
| proteasome subunit RC1.                                              | D10729   | 1.9  |
| proteasome subunit RC6-1,                                            | D30804   | 1.6  |
| proteasome subunit RC8                                               | D90258   | 1.6  |
| Cystatin beta                                                        | AI008888 | 2    |
| <b>Protein Folding</b>                                               |          |      |
| Protein disulfide isomerase (Prolyl 4-hydroxylase, beta polypeptide) | X02918   | 1.5  |
| t-complex protein (Tcp-1x) (EST similar to)                          | AA859980 | 1.8  |

|                                                                          |          |     |
|--------------------------------------------------------------------------|----------|-----|
| t-complex testis expressed 1                                             | AB010119 | 1.9 |
| <b>Protein Glycosylation</b>                                             |          |     |
| alpha 1,2-fucosyltransferase                                             | AB015637 | 1.8 |
| UDP-Gal:glucosylceramide beta-1,4-galactosyltransferase                  | AF048687 | 1.5 |
| UDP-galactose transporter related isozyme 1                              | D87991   | 1.5 |
| <b>RNA Synthesis and Binding</b>                                         |          |     |
| RNA binding protein (transformer-2-like)                                 | AI231164 | 1.6 |
| RNA helicase                                                             | AF063447 | 2   |
| <b>Secreted Protein</b>                                                  |          |     |
| fibronectin (fn-1)                                                       | U82612   | 1.8 |
| ceruloplasmin                                                            | L33869   | 1.6 |
| clusterin                                                                | M64733   | 1.6 |
| Haptoglobin                                                              | K01933   | 8.4 |
| versican V3 isoform precursor                                            | AF072892 | 4.7 |
| adrenomedullin                                                           | D15069   | 5   |
| plasminogen activator inhibitor 1                                        | M24067   | 1.8 |
| plasminogen activator inhibitor 2                                        | X64563   | 1.7 |
| <b>Transcription Regulation</b>                                          |          |     |
| high mobility group protein 2                                            | D84418   | 1.6 |
| Fos-related antigen mRNA                                                 | U34932   | 1.5 |
| Interferon regulatory factor 1                                           | M34253   | 2   |
| RDC-1 protein (POU4F1)                                                   | AJ010828 | 1.5 |
| transcription factor EF1(A)                                              | M95791   | 1.6 |
| calreticulin                                                             | D78308   | 1.5 |
| C/EBP related transcription factor                                       | S77528   | 1.9 |
| hypoxia-inducible factor 1                                               | Y09507   | 2.6 |
| <b>NF-kappa B p105 subunit</b>                                           | U83883   | 1.3 |
| <b>Translation</b>                                                       |          |     |
| ribosomal protein L13 mRNA                                               | X78327   | 1.6 |
| PHAS-I (eukaryotic translation initiation factor 4B)                     | U05014   | 1.5 |
| <b>Transport</b>                                                         |          |     |
| band 3 Cl-/HCO3- exchanger (B3RP3)                                       | J05167   | 1.8 |
| proton-coupled divalent metal ion transporters                           | AF041083 | 2.6 |
| purine specific Na+ nucleoside cotransporter (SPNT)                      | U66723   | 1.6 |
| ATP-binding cassette, subfamily C, member 8 (MRP8)                       | AA957003 | 6.4 |
| <b>Vesicle Transport</b>                                                 |          |     |
| alpha-c large chain of the protein complex AP-2 associated with clathrin | X53773   | 2   |
| clathrin-associated protein 17 (AP17)                                    | U75917   | 2.1 |
| prenylated SNARE protein Ykt6p (Ykt6)                                    | AF033027 | 1.5 |
| SNAP-23 mRNA                                                             | AF052596 | 1.5 |
| VAMP5 mRNA                                                               | AF054826 | 1.6 |
