# Supplementary material
Source: HighWire-hosted journal article supplement (https://diabetes.diabetesjournals.org/content/suppl/2002/11/12/51.11.3176)
Supplement: Supplemental_Fat_1D_repressed_db02_454.pdf [file Supplemental_Fat_1D_repressed_db02_454.pdf]

**TNF\_repressed genes, fat tissue, 1 day infusion**

| Description                                              | Accession | Fold |
|----------------------------------------------------------|-----------|------|
| <b>Blood Coagulation</b>                                 |           |      |
| Coagulation factor III (thromboplastin, tissue factor)   | U07619    | 1.4  |
| factor XIIIa                                             | Y12502    | 1.5  |
| <b>Cell Adhesion</b>                                     |           |      |
| integrin alpha chain, H36-alpha7                         | X65036    | 1.6  |
| integrin alpha-1                                         | X52140    | 1.4  |
| <b>Cell Cycle Control-Cell Stress</b>                    |           |      |
| growth arrest and DNA-damage-inducible (GADD45)          | L32591    | 1.5  |
| <b>Cell Signaling</b>                                    |           |      |
| adipocyte hormone-sensitive cyclic AMP phosphodiesterase | Z22867    | 1.5  |
| Fibroblast growth factor receptor 1 beta-isoform         | S54008    | 1.4  |
| Insulin-like growth factor binding protein 6             | M69055    | 1.9  |
| LIM domain kinase 1 isoform 1 (LIMK-1)                   | D31873    | 1.4  |
| protein kinase PASK                                      | D88190    | 2.2  |
| protein phosphatase 1 beta                               | S78218    | 1.4  |
| protein phosphatase inhibitor-1 protein                  | J05592    | 1.9  |
| S-100 beta subunit                                       | S53527    | 1.6  |
| <b>Cell Stress</b>                                       |           |      |
| Glutathione S-transferase 1 (theta)                      | D10026    | 1.6  |
| heat shock related protein                               | AI171166  | 1.5  |
| selenoprotein P                                          | AI230247  | 1.4  |
| <b>Cell Structure and Cytoskeleton</b>                   |           |      |
| myosin regulatory light chain isoform C                  | S77900    | 1.7  |
| <b>Cytokine</b>                                          |           |      |
| cardiotrophin-1                                          | D78591    | 1.5  |
| Transforming growth factor, beta 3                       | U03491    | 1.8  |
| <b>DNA Synthesis</b>                                     |           |      |
| nuclear factor I/A (NFI-A1)                              | X84210    | 1.4  |
| nuclear factor I/B (NF1-B2)                              | AB012231  | 1.6  |
| nuclear factor I/B (NF1-B3)                              | AI176488  | 1.6  |
| <b>Immune Response</b>                                   |           |      |
| mast cell protease 1 precursor (RMCP-1)                  | U67915    | 1.5  |
| MHC class II A-beta RT1.B-b-beta gene                    | M36151    | 2.2  |
| MHC class II antigen RT1.B-1 beta-chain                  | X56596    | 1.8  |
| MHC class II RT1.B-alpha chain gene                      | X07551    | 2.2  |
| MHC class II RT1.u-D-alpha chain mRNA                    | M15562    | 2    |
| MHC class II-associated invariant chain                  | X14254    | 2.2  |
| MHC RT1-B region class II (Ia antigen)                   | K02815    | 1.8  |
| MHC-associated invariant chain gamma                     | X13044    | 1.6  |
| RT1.D beta chain                                         | X53054    | 1.9  |
| Thymus cell surface antigen                              | AA874848  | 1.8  |
| <b>Metabolism amino acid</b>                             |           |      |
| alanine aminotransferase                                 | D10354    | 3.2  |
| cysteine sulfinic acid decarboxylase                     | M64755    | 1.5  |

|                                                          |          |     |
|----------------------------------------------------------|----------|-----|
| fumarylacetoacetate hydrolase (FAH)                      | M77694   | 1.5 |
| <b>Metabolism fatty acid and lipid</b>                   |          |     |
| Acyl CoA synthetase, long chain                          | AI044900 | 1.7 |
| apolipoprotein E                                         | S76779   | 1.8 |
| fatty acid synthase (EC 2.3.1.85)                        | M76767   | 4.3 |
| fatty acid synthetase, acyl carrier protein domain       | X13527   | 3.6 |
| Lipoprotein lipase                                       | L03294   | 1.4 |
| malic enzyme                                             | M26594   | 2.2 |
| microsomal carboxylesterase                              | U10697   | 1.5 |
| Perilipin                                                | L26043   | 2   |
| <b>Metabolism glucose</b>                                |          |     |
| Aldehyde reductase 1 (low Km aldose reductase)           | M60322   | 1.5 |
| dihydrolipoamide acetyltransferase                       | D10655   | 1.4 |
| GLUT4                                                    | D28561   | 2   |
| Lactate dehydrogenase B                                  | U07181   | 1.6 |
| malic enzyme mRNA, 3' flank                              | AI008020 | 2   |
| Pyruvate carboxylase                                     | U32314   | 2.1 |
| pyruvate dehydrogenase kinase 2 subunit p45 (PDK2)       | U10357   | 1.6 |
| <b>Metabolism nucleotide</b>                             |          |     |
| ATPase mRNA, partial cds                                 | U78977   | 1.9 |
| <b>Metabolism other</b>                                  |          |     |
| aldose reductase                                         | M60322   | 1.5 |
| Epoxide hydrolase 1 (microsomal xenobiotic hydrolase)    | M26125   | 1.7 |
| retinol-binding protein (RBP)                            | K03045   | 1.7 |
| <b>Mitochondrial Function</b>                            |          |     |
| NADH-cytochrome b5 reductase                             | D00636   | 1.6 |
| mitochondrial dicarboxylate carrier                      | AJ223355 | 1.4 |
| <b>Peroxisomal Protein</b>                               |          |     |
| integral peroxisomal membrane protein of 22 kDa          | X70223   | 1.8 |
| Peroxisomal membrane protein 1                           | D90038   | 1.5 |
| <b>Protein Degradation</b>                               |          |     |
| Carboxypeptidase E                                       | L07281   | 1.6 |
| carboxypeptidase Z                                       | AF017637 | 1.7 |
| Cystatin C (cysteine proteinase inhibitor)               | AI231292 | 1.4 |
| <b>Secreted Protein</b>                                  |          |     |
| collagen alpha 1 type V                                  | AJ005394 | 1.4 |
| collagen alpha1 type I                                   | Z78279   | 1.5 |
| Extracellular matrix protein 2                           | U27562   | 2.3 |
| hematopoietic lineage switch 2 related protein (Hls2-rp) | AF097723 | 1.4 |
| tenascin-X                                               | U24489   | 2.4 |
| tropoelastin                                             | J04035   | 1.6 |
| <b>Transcription Regulation</b>                          |          |     |
| hairless protein                                         | U71293   | 1.5 |
| immediate early gene transcription factor NGFI-B         | U17254   | 1.4 |
| PPAR-gamma                                               | AB011365 | 1.3 |
| Thyroid hormone responsive protein (spot14)              | K01934   | 1.6 |

**Transport**

|                                                   |        |     |
|---------------------------------------------------|--------|-----|
| ATPase, Ca <sup>++</sup> transporting, ubiquitous | M30581 | 1.5 |
| connexin (CXN-37), gap junction protein           | M76532 | 1.8 |
| neuronatin beta mRNA                              | U08290 | 1.6 |
| potassium channel protein ERG (r-erg)             | U75210 | 1.6 |
| transferrin                                       | D38380 | 1.6 |

**Vesicle Transport**

|                                                     |          |     |
|-----------------------------------------------------|----------|-----|
| trans-Golgi network integral membrane protein TGN38 | AA926242 | 1.7 |
|-----------------------------------------------------|----------|-----|
