# Supplementary material
Source: HighWire-hosted journal article supplement (https://diabetes.diabetesjournals.org/content/suppl/2002/11/12/51.11.3176)
Supplement: Supplemental_Fat_4D_induced_db02_454.pdf [file Supplemental_Fat_4D_induced_db02_454.pdf]

**TNF\_induced\_genes, fat tissue, 4-day infusion**

| Gene Names                                                              | Accession | Fold |
|-------------------------------------------------------------------------|-----------|------|
| <b>Acute Phase Protein</b>                                              |           |      |
| Haptoglobin                                                             | K01933    | 2.5  |
| <b>Apoptosis</b>                                                        |           |      |
| astrocytic phosphoprotein (PEA-15) (EST similar to AJ243949 and X86694) | AA894345  | 1.4  |
| programmed cell death 10 (pdc10) (EST similar to)                       | AA848545  | 1.5  |
| <b>Cell Adhesion</b>                                                    |           |      |
| CD37                                                                    | X53517    | 2.5  |
| Cell surface glycoprotein CD44 (hyaluronate binding protein)            | M61875    | 2.7  |
| Gal/GalNAc-specific lectin                                              | J05495    | 1.6  |
| intercellular adhesion molecule-1                                       | D00913    | 2.6  |
| Ninjurin (nerve injury induced protein)                                 | U72660    | 2.2  |
| syntenin-1 (EST similar to AJ292243)                                    | AA892373  | 1.5  |
| Vascular cell adhesion molecule 1                                       | X63722    | 3.3  |
| <b>Cell Signaling</b>                                                   |           |      |
| A2 adenosine receptor                                                   | S47609    | 1.5  |
| allograft inflammatory factor-1                                         | U17919    | 1.6  |
| beta-arrestin2                                                          | M91590    | 3.3  |
| bone marrow stromal cell antigen 1 (BST-1)                              | D49955    | 2    |
| C5a anaphylatoxin receptor                                              | X95990    | 2.5  |
| C5a receptor                                                            | AB003042  | 3    |
| casein kinase I delta                                                   | L07578    | 1.8  |
| coronin-1 (EST similar to AF143955)                                     | AA892506  | 2.7  |
| coronin-like protein                                                    | AJ006064  | 1.9  |
| dual specificity phosphatase (MAP kinase phosphatase)                   | X94185    | 2.1  |
| Epithelial membrane protein 1                                           | Z54212    | 3    |
| FGR                                                                     | X57018    | 2.1  |
| G protein-coupled P2 receptor                                           | D63665    | 1.7  |
| Grb2 (similar to D85748 and rat ash mRNA_X62853)                        | AI170776  | 2.2  |
| GTPase Rab8b (Rab8b)                                                    | U53475    | 1.5  |
| guanine nucleotide dissociation stimulator for a ras-related GTPase     | L07925    | 1.5  |
| intracellular calcium-binding protein (MRP14)                           | L18948    | 5.6  |
| Janus protein tyrosine kinase 1, JAK1.                                  | AJ000556  | 1.4  |
| Lnk1                                                                    | AA943555  | 1.4  |
| tyrosine protein kinases p56-lck (EST similar to X03533)                | AA800684  | 1.6  |
| MAP kinase kinase                                                       | L04485    | 1.6  |
| megakaryocyte hck (hemopoietic cell kinase, hck) tyrosine kinase        | S74141    | 3.8  |
| Murine leukemia viral (v-raf-1) oncogene homolog 1 (3611-MSV)           | M15427    | 1.5  |
| N-ras gene for p21 protein                                              | X68394    | 1.5  |
| P2u receptor protein                                                    | U56839    | 1.9  |
| P2x4 ATP receptor                                                       | U47031    | 2.3  |
| p38 mitogen activated protein kinase                                    | AA924542  | 1.4  |
| phosphodiesterase I                                                     | D28560    | 1.4  |
| platelet-activating factor receptor (PAF receptor)                      | U04740    | 1.4  |
| Platelet-derived growth factor receptor alpha                           | AI232379  | 1.4  |

|                                                                            |          |     |
|----------------------------------------------------------------------------|----------|-----|
| pleckstrin (Plek) (EST similar to NM_019549)                               | AA799323 | 1.7 |
| protein kinase (MUK)                                                       | D49785   | 1.9 |
| protein kinase C delta                                                     | M18330   | 2.4 |
| protein tyrosine phosphatase 20 (PTP20)                                    | U69673   | 1.4 |
| protein tyrosine phosphatase D30                                           | U28938   | 2.1 |
| rab GDI beta                                                               | X74401   | 1.9 |
| RAB12, member RAS oncogene family                                          | M83676   | 1.7 |
| RAB8                                                                       | M83675   | 1.4 |
| RAC protein kinase beta                                                    | D30041   | 1.6 |
| Rap1B (EST similar to U07795)                                              | AA944856 | 1.7 |
| ras-related protein p23                                                    | X12535   | 2   |
| ras-related rab1B protein                                                  | X13905   | 1.8 |
| RGS (regulator of G-protein signaling) (EST similar to AB042807)           | AI639103 | 1.7 |
| RhoA                                                                       | D84477   | 1.8 |
| S6 protein kinase (Rsk-1)                                                  | M99169   | 2   |
| sorcin (EST similar to XM004593)                                           | AA892921 | 1.8 |
| Spleen tyrosine kinase (Syk)                                               | U21683   | 1.8 |
| src-like adaptor protein (EST similar to mouse AJ131777)                   | AI639338 | 2.4 |
| <b>Cell Stress</b>                                                         |          |     |
| superoxide dismutase ( manganese-containing, MnSoD)                        | Y00497   | 2.5 |
| <b>Cell Structure and Cytoskeleton</b>                                     |          |     |
| capping protein (actin filament) (EST similar to NM007599)                 | AA894004 | 1.5 |
| class I beta-tubulin                                                       | AA860030 | 1.4 |
| cytoplasmic beta-actin                                                     | AI070848 | 1.5 |
| meosin (membrane-organizing extension spike protein)                       | AF004811 | 1.4 |
| myosin I heavy chain                                                       | X74800   | 1.4 |
| Myosin, heavy polypeptide 3, skeletal muscle, embryonic                    | X04267   | 1.5 |
| Myosin, heavy polypeptide 9, non-muscle                                    | U31463   | 1.5 |
| nonmuscle myosin heavy chain-A                                             | U15764   | 1.5 |
| p41-Arc                                                                    | AF083269 | 1.7 |
| slow-twitch alpha tropomyosin/hTMnm homolog                                | AA859305 | 2.1 |
| Tropomyocin 4                                                              | J02780   | 1.8 |
| <b>Collagenase</b>                                                         |          |     |
| gelatinase B (GelB, MMP9)                                                  | U24441   | 2.4 |
| <b>Cytokine, Chemokine and Their Receptors</b>                             |          |     |
| betaglycan (type III TGF-beta receptor)                                    | M77809   | 1.5 |
| CXC chemokine LIX                                                          | U90448   | 1.7 |
| CXC chemokine receptor (CXCR4)                                             | U90610   | 2.5 |
| glycoprotein 55.                                                           | X99337   | 1.6 |
| interferon gamma receptor mRNA, partial cds.                               | U68272   | 3.8 |
| interleukin-1 beta-converting enzyme (ICE, caspase 1)                      | S79676   | 1.6 |
| interleukin-1 receptor type 2                                              | Z22812   | 1.8 |
| interleukin-3 receptor beta-subunit                                        | S79263   | 1.6 |
| monocyte chemoattractant cytokine (EST similar to mouse S37648)            | AI009658 | 3.7 |
| Osteoprotegerin                                                            | U94330   | 2.1 |
| small inducible cytokine subfamily B, member 13 (EST similar to NM_018866) | AA892854 | 7.6 |

|                                                                           |          |     |
|---------------------------------------------------------------------------|----------|-----|
| TNF-alpha converting enzyme (TACE)                                        | AJ012603 | 2.4 |
| transforming growth factor-beta 1.                                        | X52498   | 2.5 |
| <b>DNA Synthesis</b>                                                      |          |     |
| CDC47 (EST similar to D26091)                                             | AA858636 | 1.4 |
| <b>Immune Response</b>                                                    |          |     |
| anti-idiotypic immunoglobulin M light chain gene                          | U75411   | 1.4 |
| C1q, c polypeptide (EST similar to NM_007574)                             | AA891576 | 1.4 |
| CD14 (monocyte differentiation antigen )                                  | AF087944 | 4   |
| CD38 antigen (ADP-ribosyl cyclase / cyclic ADP-ribose hydrolase)          | D29646   | 3.1 |
| CD4 antigen (p55)                                                         | M15768   | 3.2 |
| class III Fc-gamma receptor                                               | M32062   | 3.5 |
| complement C1q C chain (similar to NM007574, X66295)                      | AA891576 | 1.9 |
| complement component C3                                                   | M29866   | 1.6 |
| complement component factor B (EST similar to BC005451)                   | AI639117 | 1.6 |
| complement protein C1q beta chain                                         | X71127   | 1.8 |
| cyclase-associated protein homologue (MCH1)                               | L11930   | 2.8 |
| DORA protein.                                                             | AJ223184 | 3.7 |
| Fc gamma receptor.                                                        | X73371   | 3.3 |
| Ig heavy chain VDJ-region CH1-CH2.                                        | X68782   | 1.5 |
| Lectin, galactose binding, soluble 9 (Galectin-9)                         | U72741   | 1.8 |
| leukocyte antigen MRC-OX44                                                | M57276   | 3   |
| leukocyte common antigen (L-CA)                                           | M10072   | 1.6 |
| Lysozyme                                                                  | AA892775 | 2.4 |
| MHC class I antigen gene (RT1-u haplotype)                                | M64795   | 1.8 |
| MHC class Ib antigen (RT1.CI)                                             | AF025308 | 1.6 |
| MHC class II A-beta RT1.B-b-beta gene                                     | M36151   | 6.1 |
| MHC class II antigen RT1.B-1 beta-chain.                                  | X56596   | 2.8 |
| MHC class II RT1.u-D-alpha chain                                          | M15562   | 2.1 |
| MHC class II-associated invariant chain.                                  | X14254   | 3.6 |
| MHC class II-like alpha chain (RT1.DMa) mRNA, partial cds.                | U31598   | 2.8 |
| MHC class II-like beta chain (RT1.DMb)                                    | U31599   | 5.9 |
| MHC RT1-B region class II (Ia antigen) A-alpha glycoprotein               | K02815   | 2.6 |
| MHC-associated invariant chain gamma                                      | X13044   | 1.8 |
| pre-pro-complement C3                                                     | X52477   | 7.6 |
| properdin (EST identical to X12905, complement component)                 | AI639534 | 2   |
| Rat MHC class II RT1.B-alpha chain gene, exon 2, 3 and 4, clone lambda 7. | X07551   | 4.4 |
| RT1.D beta chain.                                                         | X53054   | 4.8 |
| RT1.Ma.                                                                   | Z49761   | 3.5 |
| RT1.Mb                                                                    | AI171966 | 2.2 |
| T-cell receptor active beta-chain C-region                                | M18854   | 1.4 |
| <b>Inflammatory Response</b>                                              |          |     |
| five-lipoxygenase activating protein (FLAP)                               | X52196   | 1.9 |
| leukotriene A4 hydrolase                                                  | S87522   | 1.5 |
| phospholipase A2 precursor                                                | X51529   | 1.7 |
| <b>Lysosomal Membrane Protein</b>                                         |          |     |
| lysosomal acid phosphatase 2 (Acp2) (EST similar to NM_016988)            | AI234950 | 1.7 |

|                                                                        |          |     |
|------------------------------------------------------------------------|----------|-----|
| vacuole membrane protein 1 (EST similar to AF411216)                   | AA859954 | 1.7 |
| <b>Metabolism (Amino Acid and Protein)</b>                             |          |     |
| catechol-O-methyltransferase                                           | M93257   | 1.8 |
| cytosolic branch chain aminotransferase                                | U35774   | 2.8 |
| iodothyronine 5'-monodeiodinase (5'-MD)                                | M21476   | 2.3 |
| N-terminal asparagine amidohydrolase (Ntan1) (EST similar to U57692)   | AA894101 | 1.5 |
| <b>Metabolism (Fatty acid and Lipid)</b>                               |          |     |
| acyl-CoA hydrolase                                                     | Y09332   | 1.6 |
| adipose differentiation-related protein (ADRP) (EST similar to L09734) | AA893280 | 1.7 |
| Apolipoprotein B editing protein                                       | L07114   | 2.2 |
| apolipoprotein E                                                       | S76779   | 1.6 |
| carnitine octanoyltransferase mRNA (COT)                               | J02844   | 1.6 |
| fatty acid translocase/CD36, EST similar to AF 072411                  | AA799326 | 2.9 |
| fatty acid transporter                                                 | AB005743 | 2.3 |
| GM2 activator protein.                                                 | E12286   | 2.6 |
| lysosomal acid lipase (intracellular hydrolase)                        | S81497   | 2.2 |
| palmitoyl-protein thioesterase                                         | L34262   | 1.8 |
| uncoupling protein 2                                                   | AB005143 | 1.5 |
| <b>Metabolism (Glucose)</b>                                            |          |     |
| aldolase A                                                             | U20643   | 4.8 |
| Enolase 1, alpha                                                       | X02610   | 1.5 |
| glycogen phosphorylase                                                 | X04069   | 1.7 |
| glycogenin                                                             | L01793   | 2   |
| N-glycan alpha 2,8-sialyltransferase (EST similar to X86000)           | AA893663 | 1.5 |
| pyruvate dehydrogenase E1 alpha form 1 subunit                         | Z12158   | 1.8 |
| transaldolase (EST similar to AF069306)                                | AA799452 | 1.5 |
| transketolase                                                          | AI059508 | 1.9 |
| <b>Metabolism (Nucleotide)</b>                                         |          |     |
| 5-aminoimidazole-4-carboxamide ribonucleotide formyltransferase        | D89514   | 2.4 |
| ADP-ribosylarginine hydrolase                                          | M86341   | 1.8 |
| ADP-ribosyltransferase (NAD+; poly (ADP-ribose) polymerase)            | U94340   | 2   |
| GTP cyclohydrolase I (EST similar to M58364)                           | AA859496 | 1.5 |
| <b>Metabolism (Other)</b>                                              |          |     |
| acid ceramidase (EST similar to NM_019734)                             | AA800062 | 1.4 |
| ceruloplasmin                                                          | L33869   | 2.6 |
| Heme oxygenase                                                         | J02722   | 2.8 |
| heparan sulfate 6-sulfotransferase-1 (EST similar to AB024566)         | AA859740 | 1.6 |
| UDP-glucuronosyltransferase (3-methylcholanthrene-inducible )          | S56937   | 2.4 |
| <b>Mitochondrial Function</b>                                          |          |     |
| cytochrome b558 alpha-subunit                                          | U18729   | 2.9 |
| Cytochrome P450 1b1                                                    | U09540   | 3.1 |
| cytochrome P450 Cyp7b1                                                 | U36992   | 7.3 |
| <b>mRNA processing</b>                                                 |          |     |
| major vault protein                                                    | U09870   | 1.7 |
| polypyrimidine tract binding protein                                   | X74565   | 1.9 |
| <b>Nuclear Import/Export Protein</b>                                   |          |     |

|                                                                                 |          |     |
|---------------------------------------------------------------------------------|----------|-----|
| glycoprotein p62                                                                | M62992   | 1.4 |
| <b>Nuclear Import/Export Protein</b>                                            |          |     |
| histone H3.3 (X73683) (EST similar to)                                          | AI177503 | 1.5 |
| nucleolar phosphoprotein of 140kD, Nopp140                                      | AA892919 | 1.7 |
| <b>Peptide Hormone Production</b>                                               |          |     |
| endothelin-converting enzyme                                                    | AA956930 | 1.5 |
| <b>Protein Degradation</b>                                                      |          |     |
| cathepsin C.                                                                    | D90404   | 3.9 |
| cathepsin S                                                                     | L03201   | 1.6 |
| Cystatin beta                                                                   | AI008888 | 1.5 |
| preprocathepsin D (EC 3.4.23.5)                                                 | AI235585 | 2   |
| Zn-peptidase aminopeptidase N                                                   | M25073   | 1.6 |
| <b>Protein Synthesis</b>                                                        |          |     |
| EF-2                                                                            | AA892801 | 2   |
| PHAS-I (4E-BP-1)                                                                | U05014   | 1.4 |
| <b>Proteoglycan</b>                                                             |          |     |
| biglycan                                                                        | AA859830 | 2.4 |
| ryudocan (heparan sulfate proteoglycan core protein)                            | S61868   | 1.9 |
| <b>Secreted Protein</b>                                                         |          |     |
| alpha-2 type I collagen (EST similar to K01832)                                 | AA866454 | 1.7 |
| fibronectin (fn-1)                                                              | U82612   | 7.3 |
| lysyl oxidase                                                                   | AI234060 | 2.2 |
| sulfated glycoprotein-1                                                         | S81353   | 2   |
| tenascin                                                                        | U09361   | 6   |
| <b>Transcription Regulation</b>                                                 |          |     |
| early development regulator 2 (homolog of polyhomeotic 2) (EST similar to)      | AA859952 | 1.6 |
| estrogen-responsive uterine mRNA, partial sequence; full lenth=U53184           | AI237535 | 2.3 |
| hypoxia-inducible factor 1 (HIF-1)                                              | Y09507   | 1.6 |
| J kappa recombination signal sequence binding protein (EST similar to mouse_S63 | AA894312 | 2.3 |
| nuclear factor kappa B p105 subunit                                             | L26267   | 2   |
| signal transducer and activator of transcription 6 (stat6)                      | AF055292 | 1.7 |
| thyrotroph embryonic factor=leucine zipper transcription factor (TEF)           | S58745   | 1.6 |
| TRAP-complex gamma subunit                                                      | Z14030   | 1.9 |
| <b>Transport (Ion and Small Molecules)</b>                                      |          |     |
| ATPase, Na+K+ transporting, alpha 1 polypeptide                                 | M74494   | 2.1 |
| brain sodium channel III                                                        | Y00766   | 1.7 |
| chloride channels (CIC-K2L and CIC-K2S)                                         | D26111   | 1.7 |
| gamma subunit of sodium potassium ATPase                                        | X70062   | 3.2 |
| intercellular calcium-binding protein (MRP8)                                    | AA957003 | 4.5 |
| lysosomal H+ ATPase, vacuolar proton pump (EST similar to)                      | AA893217 | 1.6 |
| monocarboxylate transporter (MCT3)                                              | U87627   | 1.8 |
| potassium channel beta 2 subunit (EST similar to U31908)                        | H33656   | 1.8 |
| vacuolar adenosine triphosphatase subunit B.                                    | Y12635   | 2.2 |
| <b>Vesicle Coating Protein</b>                                                  |          |     |
| beta-chain clathrin associated protein complex AP-1                             | AI028975 | 1.7 |
| caveolin.                                                                       | Z46614   | 2.3 |

|                                                                 |          |     |
|-----------------------------------------------------------------|----------|-----|
| clathrin-associated protein 17 (AP17)                           | U75917   | 1.7 |
| <b>vesicle Transport (Including Endocytosis and Exocytosis)</b> |          |     |
| Annexin A4 (EST similar to)                                     | AI171167 | 1.8 |
| clathrin assembly protein short form (CALM)                     | AF041373 | 2.4 |
| EF-hand Ca <sup>2+</sup> -binding protein p22                   | U39875   | 1.6 |
| Myristoylated alanine-rich protein kinase C substrate           | AA955167 | 1.7 |
| syntaxin binding protein 1 (EST similar to NM009295)            | AI102079 | 1.4 |
| VAMP5                                                           | AF054826 | 1.7 |
| <b>Other</b>                                                    |          |     |
| amyloid precursor-like protein 2                                | X77934   | 1.8 |
| Nclone10 mRNA.                                                  | U31866   | 2.1 |
