# Supplementary material
Source: HighWire-hosted journal article supplement (https://diabetes.diabetesjournals.org/content/suppl/2002/11/12/51.11.3176)
Supplement: Supplemental_Fat_4D_repressed_db02_454.pdf [file Supplemental_Fat_4D_repressed_db02_454.pdf]

**TNF\_suppressed genes, fat tissue, 4-day infusion**

| Gene name                                                               | Accession | Fold |
|-------------------------------------------------------------------------|-----------|------|
| <b>Apoptosis</b>                                                        |           |      |
| alpha-crystallin B chain                                                | M55534    | 1.7  |
| <b>Cell Adhesion</b>                                                    |           |      |
| integrin alpha chain H36-alpha7                                         | X65036    | 4.8  |
| <b>Cell Cycle Progression</b>                                           |           |      |
| cell cycle progression related D123                                     | U34843    | 1.6  |
| G0/G1 switch gene 2 (G0s2) (EST similar to NM_008059)                   | AA893235  | 1.9  |
| growth-arrest-specific Gas-3 homolog                                    | S55427    | 1.4  |
| <b>Cell Signaling</b>                                                   |           |      |
| adenylate kinase 3                                                      | AI176052  | 1.6  |
| annexin V-binding protein (ABP-7)                                       | D64061    | 1.4  |
| beta 3-adrenergic receptor                                              | S56481    | 2.4  |
| Ca <sup>++</sup> /calmodulin-dependent protein kinase II, delta subunit | AA894330  | 1.4  |
| cAMP-dependent protein kinase (type II) regulatory subunit              | M12492    | 2.1  |
| Cdc42Hs-associated tyrosine kinase (EST similar to)                     | H31144    | 1.5  |
| FKBP 12 (EST similar to BC004671)                                       | AI176170  | 1.4  |
| G protein beta1 subunit (rGb1)                                          | U88324    | 1.8  |
| Inositol 1, 4, 5-triphosphate receptor 3                                | L06096    | 1.6  |
| Insulin-like growth factor binding protein 6                            | M69055    | 1.7  |
| Insulin-like growth factor-binding protein 5                            | AI029920  | 3    |
| metabotropic glutamate receptor (GLUR4)                                 | AB003515  | 1.4  |
| Neuron-specific antigen HPC-1, homologous to epimorphin/syntaxin 2      | D10392    | 1.8  |
| protein phosphatase 1 beta                                              | S78218    | 1.7  |
| protein phosphatase 2A-beta catalytic subunit                           | M23591    | 1.4  |
| protein phosphatase inhibitor-1                                         | J05592    | 2.3  |
| Rat rhoB (ras homolog gene family, member B)                            | AA900505  | 1.4  |
| RGS-GAIP interacting protein GIPC                                       | AF089817  | 1.5  |
| S100 alpha                                                              | S68809    | 1.7  |
| sensory neuron synuclein                                                | X86789    | 1.7  |
| tyrosine phosphatase (PRL-1)                                            | L27843    | 1.4  |
| <b>Cell Stress</b>                                                      |           |      |
| Glutathione S-transferase 1 (theta)                                     | AI138143  | 2.5  |
| heat shock protein (Hsp27)                                              | AA998683  | 1.8  |
| heat shock protein 70 (HSP70)                                           | L16764    | 2.2  |
| <b>Cell Structure and Cytoskeleton</b>                                  |           |      |
| keratin type I (EST similar to M13806)                                  | AI639415  | 2.4  |
| non-muscle myosin light chain 3 (MLC3nm) (EST similar to U04443)        | AA875523  | 1.9  |
| smooth muscle alpha-actin                                               | AA900769  | 1.8  |
| tropomyosin 1                                                           | L00382    | 2    |
| <b>Chaperone</b>                                                        |           |      |
| GRP94/endoplasmic                                                       | S69316    | 1.6  |
| <b>DNA Synthesis</b>                                                    |           |      |
| DNA topoisomerase II                                                    | AA892773  | 1.6  |
| <b>Immune Response</b>                                                  |           |      |

|                                                                                   |          |     |
|-----------------------------------------------------------------------------------|----------|-----|
| CD81 antigen (target of antiproliferative antibody 1)                             | AI103957 | 1.5 |
| Thymus cell surface antigen                                                       | AA874848 | 1.8 |
| <b>Metabolism (amino acid)</b>                                                    |          |     |
| Asparagine synthetase                                                             | U07201   | 1.7 |
| Branched chain alpha-ketoacid dehydrogenase subunit E1 alpha cysteine dioxygenase | J02827   | 1.7 |
| Isovaleryl Coenzyme A dehydrogenase                                               | AA942685 | 2.1 |
| N-G,N-G-dimethylarginine dimethylaminohydrolase                                   | J05031   | 2.4 |
| phosphoserine aminotransferase (EST similar to AF259674)                          | AA945152 | 1.5 |
|                                                                                   | AI102868 | 2.3 |
| <b>Metabolism (cholesterol)</b>                                                   |          |     |
| cytosolic 3-hydroxy 3-methylglutaryl coenzyme A synthase (EC 4.1.3.5)             | X52625   | 1.4 |
| <b>Metabolism (fatty acid and lipid)</b>                                          |          |     |
| Acyl CoA synthetase, long chain                                                   | AI044900 | 2.3 |
| adipocyte fatty acid binding protein (A-FABP)                                     | AI169612 | 1.7 |
| diacylglycerol acyltransferase (EST similar to BC003717)                          | AA859529 | 1.5 |
| diazepam binding inhibitor (DBI), acyl-CoA binding protein                        | AI010581 | 1.6 |
| fatty acid synthase (EC 2.3.1.85)                                                 | M76767   | 2.2 |
| Hormone - sensitive lipase, testicular isoform                                    | U40001   | 2.2 |
| Lipoprotein lipase                                                                | L03294   | 1.9 |
| Lysophospholipase                                                                 | AA800220 | 1.5 |
| phosphatidylinositol transfer protein (beta isoform)                              | D21132   | 1.4 |
| Phospholipase C (BETA4)                                                           | L15556   | 2.3 |
| <b>Metabolism (glucose)</b>                                                       |          |     |
| Na <sup>+</sup> /glucose cotransporter                                            | U03120   | 1.5 |
| NADP-dependent isocitrate dehydrogenase                                           | AA892314 | 1.5 |
| Pyruvate carboxylase                                                              | U32314   | 2.4 |
| pyruvate dehydrogenase beta (PDH8) (EST similar to NM_000925)                     | AA892828 | 1.5 |
| <b>Metabolism (nucleotide)</b>                                                    |          |     |
| AIRC mRNA for AIR carboxylase-SAICAR synthetase                                   | AA866248 | 1.4 |
| Phosphoribosylpyrophosphate synthetase                                            | X16555   | 3.7 |
| <b>Metabolism (other)</b>                                                         |          |     |
| cysteine sulfinic acid decarboxylase                                              | M64755   | 2.2 |
| ecto-ATPase                                                                       | AI230130 | 1.8 |
| esterase (ES-10, PI 6.1)                                                          | L46791   | 1.9 |
| NADH dehydrogenase (ubiquinone) 1 beta subcomplex 3 (EST similar to XM_002518)    | AA799499 | 1.4 |
| phospholipid hydroperoxide glutathione peroxidase                                 | L24896   | 1.4 |
| retinol-binding protein (RBP)                                                     | M10934   | 2.3 |
| ubiquinol-cytochrome c reductase (smallest subunit) (EST similar to)              | AA926137 | 1.5 |
| <b>Mitochondrial Function</b>                                                     |          |     |
| cytochrome B gene (EST similar to)                                                | AI103396 | 1.7 |
| Cytochrome C                                                                      | K00750   | 1.6 |
| cytochrome c oxidase subunit I (EST similar to)                                   | AI010292 | 1.5 |
| cytochrome c oxidase subunit IV                                                   | AA818226 | 1.5 |
| cytochrome oxidase subunit I                                                      | S79304   | 2   |
| F1-ATPase epsilon subunit                                                         | AI171844 | 1.4 |
| membrane protein-73 (inner mitochondrial membrane protein)                        | S63519   | 1.4 |

|                                                                                            |          |     |
|--------------------------------------------------------------------------------------------|----------|-----|
| mitochondrial cytochrome oxidase subunits I, II, III (EST similar to)                      | AA893485 | 1.4 |
| mitochondrial cytochrome B gene (EST similar to)                                           | AI179150 | 1.4 |
| mitochondrial cytochrome oxidase subunits I,II, III                                        | J01435   | 1.5 |
| mitochondrial dicarboxylate carrier                                                        | AJ223355 | 1.4 |
| NADH ubiquinone oxidoreductase subunit (IP13)                                              | L38437   | 1.5 |
| NADPH-cytochrome P-450 oxidoreductase                                                      | M10068   | 1.6 |
| oligomycin sensitivity conferring protein                                                  | D13127   | 1.4 |
| tricarboxylate carrier                                                                     | S70011   | 1.8 |
| <b>mRNA Degradation</b>                                                                    |          |     |
| AU RNA-binding protein/enoyl-coenzyme A hydratase (EST similar to NM_016709)               | AA859688 | 1.5 |
| <b>Nuclear Protein</b>                                                                     |          |     |
| autoantigen                                                                                | X67859   | 1.4 |
| <b>Other</b>                                                                               |          |     |
| beta-globin (EST similar to X16417)                                                        | AI179576 | 1.6 |
| R-esp1                                                                                     | L14462   | 1.4 |
| tumor-suppressive gene                                                                     | S72637   | 1.4 |
| <b>Protein Degradation</b>                                                                 |          |     |
| Dipeptidyl peptidase 4                                                                     | J04591   | 1.7 |
| Nedd4 WW domain binding protein 4 (EST similar to AF220208)                                | AI639058 | 1.7 |
| <b>Protein Modification</b>                                                                |          |     |
| vitamin K-dependent gamma-glutamyl carboxylase                                             | AF065387 | 1.4 |
| <b>Protein Synthesis</b>                                                                   |          |     |
| elongation factor 1-alpha                                                                  | M81088   | 1.4 |
| ribosomal protein L21                                                                      | AA849648 | 1.6 |
| ribosomal protein L23                                                                      | X58200   | 1.4 |
| ribosomal protein L35a                                                                     | AI103236 | 1.4 |
| ribosomal protein S21                                                                      | AI178207 | 1.4 |
| ribosomal protein S29 (EST similar to NM_012876)                                           | AA965264 | 1.5 |
| <b>Secreted Protein (Extracellular Matrix)</b>                                             |          |     |
| alpha-1 type I collagen                                                                    | M27207   | 1.5 |
| decorin                                                                                    | X59859   | 1.5 |
| extracellular matrix protein 2                                                             | U27562   | 2.6 |
| osteonectin (SPARC, secreted acidic cysteine-rich glycoprotein) (EST similar to NM_012656) | AA946313 | 1.5 |
| tropoelastin                                                                               | J04035   | 2.4 |
| TSH receptor (truncated form)                                                              | D38036   | 1.4 |
| <b>Secreted Protein (inflammatory response)</b>                                            |          |     |
| ebnerin                                                                                    | U32681   | 2   |
| <b>Secreted Protein (blood coagulation)</b>                                                |          |     |
| Coagulation factor III (thromboplastin, tissue factor)                                     | U07619   | 1.6 |
| protein S                                                                                  | U06230   | 1.8 |
| <b>Secreted Protein (immune response)</b>                                                  |          |     |
| C4 complement protein                                                                      | U42719   | 1.6 |
| adipsin                                                                                    | M92059   | 1.6 |
| <b>Secreted Protein (peptide hormone)</b>                                                  |          |     |
| angiotensinogen                                                                            | M12112   | 2.3 |
| <b>Transcription Regulation</b>                                                            |          |     |

|                                                              |          |     |
|--------------------------------------------------------------|----------|-----|
| BTE binding protein                                          | D12769   | 1.6 |
| High mobility group 1                                        | M64986   | 1.4 |
| NF1-X1 (CCAAT binding transcription factor)                  | AB012234 | 1.7 |
| NFI-A1 (CCAAT binding transcription factor)                  | X84210   | 1.6 |
| retinoid X receptor gamma (RXRgamma)                         | AF016387 | 1.5 |
| sperm membrane protein (YWK-II)                              | M31322   | 1.4 |
| Thyroid hormone responsive protein (spot14)                  | K01934   | 2.2 |
| Transforming growth factor beta stimulated clone 22          | L25785   | 1.5 |
| <b>Transport</b>                                             |          |     |
| amiloride sensitive Na <sup>+</sup> channel protein          | X70521   | 1.4 |
| brain calcium channel alpha-1 subunit (rbC-I)                | M59786   | 1.6 |
| connexin 40 (GJA5)                                           | AF022136 | 1.6 |
| ELK channel 2 (Dm Eag-like K channel)                        | AJ007627 | 1.5 |
| vesicular acetylcholine transporter (rVACHT)                 | U09211   | 1.6 |
| <b>Vesicle Coating Protein</b>                               |          |     |
| nonclathrin coat protein zeta2-cop (EST similar to AB040137) | AA893634 | 1.6 |
