# Supplementary material
Source: HighWire-hosted journal article supplement (https://diabetes.diabetesjournals.org/content/suppl/2002/11/12/51.11.3176)
Supplement: Supplemental_liver_4D_induced_db02_454.pdf [file Supplemental_liver_4D_induced_db02_454.pdf]

**TNF\_induced\_list, liver, 4-day infusion**

| Description                                                                  | Accession | Fold |
|------------------------------------------------------------------------------|-----------|------|
| <b>Apoptosis</b>                                                             |           |      |
| nuclear oncoprotein p53                                                      | X13058    | 1.6  |
| <b>Cell Cycle Progression and Cell Growth</b>                                |           |      |
| CRP2 (cysteine-rich protein 2)                                               | D17512    | 1.4  |
| polo like kinase (plk)                                                       | U10188    | 1.8  |
| <b>Cell Signaling</b>                                                        |           |      |
| GPCR-5-1 gene, P2Y4 nucleotide receptor                                      | Y14706    | 1.5  |
| N-Shc                                                                        | AB001453  | 1.5  |
| synaptic SAPAP-interacting protein Synamon                                   | AF102855  | 1.3  |
| <b>Cell Stress (Including Chaperone)</b>                                     |           |      |
| calnexin (EST similar to NM_007597)                                          | AA893328  | 1.5  |
| EST similar to N-myc downstream regulated, member 4, BC006595                | AF045564  | 2    |
| <b>Immune Response</b>                                                       |           |      |
| lipopolysaccharide binding protein                                           | L32132    | 2.2  |
| Lysozyme                                                                     | AA892775  | 2.7  |
| <b>Inflammatory Response</b>                                                 |           |      |
| phospholipase A2 precursor                                                   | X51529    | 3.4  |
| <b>Metabolism (Cholesterol)</b>                                              |           |      |
| 3-hydroxy-3-methylglutaryl-Coenzyme A synthase 1 (Est similar to NM_017268)  | AI177004  | 2.3  |
| 7-dehydrocholesterol reductase (DHCR7)                                       | AB016800  | 1.8  |
| farnesyl diphosphate synthase                                                | M89945    | 1.5  |
| HMG-CoA reductase                                                            | X55286    | 1.5  |
| lanosterol 14-alpha-demethylase                                              | AA997614  | 2.4  |
| squalene synthetase                                                          | M95591    | 2.4  |
| sterol-C4-methyl oxidase-like (EST similar to RANP-1_D50559)                 | E12625    | 2.1  |
| <b>Metabolism (Fatty Acid)</b>                                               |           |      |
| fatty acid synthase (EC 2.3.1.85)                                            | M76767    | 1.8  |
| FAT                                                                          | AF072411  | 2.4  |
| <b>Metabolism (Glucose)</b>                                                  |           |      |
| Aldolase A, fructose-bisphosphate                                            | M12919    | 1.3  |
| glucose-6-phosphate dehydrogenase (Gd, EC 1.1.1.49)                          | X07467    | 1.8  |
| phosphoprotein enriched in astrocytes (PEA-15 gene, EST similar to AJ243949) | AA891797  | 1.7  |
| <b>Metabolism (Heme)</b>                                                     |           |      |
| Heme oxygenase                                                               | J02722    | 1.7  |
| <b>Metabolism (Nucleotide)</b>                                               |           |      |
| xanthine dehydrogenase                                                       | AI172247  | 1.7  |
| <b>Nuclear Protein</b>                                                       |           |      |
| Histone H1-O                                                                 | AA874802  | 1.4  |
| <b>Protein Degradation</b>                                                   |           |      |
| calpain small subunit (css1)                                                 | AA892814  | 1.3  |
| contrapsin-like protease inhibitor related protein (CPI-26)                  | D00753    | 1.3  |
| type I procollagen C-proteinase enhancer protein (PCPE)                      | AF016503  | 1.9  |
| <b>Protein Synthesis</b>                                                     |           |      |
| PHAS-I                                                                       | AI178828  | 2.1  |

|                                                                   |          |      |
|-------------------------------------------------------------------|----------|------|
| <b>Secreted Protein (Acute phase protein)</b>                     |          |      |
| alpha-1-acid glycoprotein                                         | V01216   | 1.7  |
| <b>Secreted Protein (Immune Response)</b>                         |          |      |
| complement component 1q, c polypeptide (EST similar to NM_007574) | AA891576 | 1.5  |
| Complement component 4 binding protein, alpha                     | Z50051   | 1.4  |
| complement protein C1q beta chain                                 | X71127   | 1.4  |
| eosinophil cationic protein (ECP)                                 | D88586   | 1.4  |
| properdin (EST similar to X12905)                                 | AI639534 | 1.3  |
| <b>Secreted Protein (plasma protein)</b>                          |          |      |
| alpha-2 macroglobulin                                             | M23566   | 10.9 |
| alpha-fibrinogen                                                  | X86561   | 1.5  |
| ceruloplasmin (EST similar to L33869)                             | AA817854 | 2    |
| thyroxine-binding globulin (TBG)                                  | M63991   | 2.5  |
| <b>Transcription Regulation</b>                                   |          |      |
| add1 (SREBP1)                                                     | L16995   | 2    |
| pJunB                                                             | X54686   | 1.6  |
| <b>Transport</b>                                                  |          |      |
| ATP-binding cassette, sub-family B, member 3 (mtp2)               | X63854   | 1.3  |
| tight junction protein 1 (Tjp1, ZO-1) (EST similar to NM_009386)  | AA892918 | 1.5  |
