# Supplementary material
Source: HighWire-hosted journal article supplement (https://diabetes.diabetesjournals.org/content/suppl/2002/11/12/51.11.3176)
Supplement: Supplemental_liver_4D_repressed_db02_454.pdf [file Supplemental_liver_4D_repressed_db02_454.pdf]

| TNF_repressed genes, liver, 4-day infusion                        |           |
|-------------------------------------------------------------------|-----------|
| Description                                                       | Accession |
| <b>Cell Adhesion</b>                                              |           |
| claudin 3 (EST similar to NM_031700)                              | M74067    |
| <b>Cell Cycle Progression</b>                                     |           |
| cyclin D1                                                         | X75207    |
| <b>Cell Signaling</b>                                             |           |
| growth hormone receptor, short isoform                            | S49003    |
| olfactory receptor-like protein gene                              | AF029357  |
| <b>Cell Stress</b>                                                |           |
| cell growth regulator with ring finger domain (rCGR19)            | U66471    |
| DnaJ homolog 2                                                    | A1170685  |
| gamma-glutamylcysteine synthetase light subunit                   | A1233261  |
| <b>Immune Response</b>                                            |           |
| immunoglobulin rearranged kappa-chain mRNA variable (V) region    | L07407    |
| <b>Metabolism (amino acid)</b>                                    |           |
| argininosuccinate lyase                                           | D13978    |
| serine dehydratase (SDH2), EC 4.2.1.13                            | J03863    |
| <b>Metabolism (fatty acid and lipid)</b>                          |           |
| Carnitine palmitoyltransferase 2                                  | J05470    |
| carnitine palmitoyltransferase I                                  | L07736    |
| delta3, delta2-enoyl-CoA isomerase                                | D00729    |
| mitochondrial 3-2trans-enoyl-CoA isomerase                        | A1170568  |
| monoglyceride lipase (EST similar to NM_011844)                   | AA892864  |
| peroxisomal enoyl hydratase-like protein (PXEL)                   | U08976    |
| <b>Metabolism (glucose)</b>                                       |           |
| Glycogen synthase 2 (liver)                                       | J05446    |
| <b>Metabolism(nucleotide)</b>                                     |           |
| phosphodiesterase I                                               | D28560    |
| <b>Metabolism (steroid)</b>                                       |           |
| 17-beta hydroxysteroid dehydrogenase type 2                       | X91234    |
| <b>Mitochondrial Function</b>                                     |           |
| NADPH-cytochrome P-450 oxidoreductase                             | M10068    |
| soluble NADPH-cytochrome P450 redutase                            | E01524    |
| <b>Protein Translation</b>                                        |           |
| Initiation factor eIF-2B gamma subunit (eIF-2B gamma)             | A1639441  |
| <b>Transcription Regulation</b>                                   |           |
| BTE binding protein (basal transcription element binding protein) | D12769    |
| D site albumin promoter binding protein                           | J03179    |
| hypoxia induced gene 1 (EST similar to NM_019814)                 | AA891422  |
| small heterodimer partner homolog                                 | D86580    |
| zinc finger protein (kid-1)                                       | M96548    |
| <b>Transport</b>                                                  |           |
| potassium channel beta 2 subunit (EST similar to U31908)          | H33656    |

Fold

1.4

2.2

1.4

1.5

1.5

1.4

1.4

1.8

1.5

2.1

1.3

1.4

1.5

1.5

1.4

1.7

1.8

1.6

1.6

1.8

1.6

2.3

1.4

2.6

1.5

1.5

1.8

1.4
