# Supplementary material
Source: HighWire-hosted journal article supplement (https://diabetes.diabetesjournals.org/content/suppl/2002/11/12/51.11.3176)
Supplement: Supplemental_M_1D_induced_db02_454.pdf [file Supplemental_M_1D_induced_db02_454.pdf]

TNF-induced genes, muscle, 1-day infusion  
none
