# Supplementary material
Source: HighWire-hosted journal article supplement (https://diabetes.diabetesjournals.org/content/suppl/2002/11/12/51.11.3176)
Supplement: Supplemental_M_4D_induced_db02_454.pdf [file Supplemental_M_4D_induced_db02_454.pdf]

TNF\_induced\_list, muscle, 4-day infusion

| Description                                        | Accession | Fold |
|----------------------------------------------------|-----------|------|
| high molecular weight DNA polymerase beta (rnpolb) | AA957640  | 1.5  |
| T-cell receptor gamma chain                        | AI176307  | 1.5  |
| acetylcholine receptor gamma-subunit               | X74834    | 1.5  |
