# Supplementary material
Source: HighWire-hosted journal article supplement (https://diabetes.diabetesjournals.org/content/suppl/2002/11/12/51.11.3176)
Supplement: Supplemental_M_4D_repressed_db02_454.pdf [file Supplemental_M_4D_repressed_db02_454.pdf]

TNF\_suppressed\_list, muscle, 4-day infusion

| Description                                                  | Accession | Fold |
|--------------------------------------------------------------|-----------|------|
| <b>Cell Stress (Including Chaperones)</b>                    |           |      |
| Catalase                                                     | M11670    | 1.5  |
| cyclophilin                                                  | AA818858  | 1.5  |
| <b>Cell Structure and Cytoskeleton</b>                       |           |      |
| vimentin                                                     | X62952    | 1.7  |
| <b>Metabolism (Amino Acid)</b>                               |           |      |
| glutamate dehydrogenase (EC 1.4.1.3)                         | AI233216  | 1.9  |
| <b>Metabolism (Lipoprotein)</b>                              |           |      |
| Apolipoprotein C1                                            | X15512    | 2.5  |
| apolipoprotein E                                             | S76779    | 3.8  |
| <b>Metabolism (Other)</b>                                    |           |      |
| Branched chain alpha-ketoacid dehydrogenase subunit E1 alpha | J02827    | 1.6  |
| mercaptopyruvate sulfurtransferase                           | D50564    | 1.5  |
| neuraminidase 2                                              | AI171959  | 1.6  |
| retinol-binding protein (RBP)                                | M10934    | 2.8  |
| <b>Mitochondrial function</b>                                |           |      |
| cytochrome P450, 2c39                                        | AA945573  | 2.5  |
| ATPase inhibitor (rat mitochondrial IF1 protein)             | AA945585  | 3.1  |
| <b>Protein degradation</b>                                   |           |      |
| fetuin                                                       | X63446    | 2.9  |
| alpha-1 inhibitor III                                        | J03524    | 4.5  |
| serine proteinase inhibitor-like protein                     | X16273    | 4.4  |
| alpha-1-protease inhibitor                                   | AI010453  | 3.8  |
| <b>Protein Synthesis</b>                                     |           |      |
| PHAS-I mRNA                                                  | U05014    | 1.9  |
| <b>Secreted Protein (Plasma Protein)</b>                     |           |      |
| Transthyretin (prealbumin, amyloidosis type I)               | AA945169  | 3.3  |
| alpha-1-macroglobulin                                        | AA945569  | 2.2  |
| polyprotein 1-microglobulin/bikunin                          | S87544    | 1.8  |
| Haptoglobin                                                  | K01933    | 3.3  |
| hemopexin                                                    | M62642    | 3.9  |
| alpha-fibrinogen                                             | M35601    | 2.9  |
| vitamin D binding protein (DBP)                              | M12450    | 3.5  |
| alpha-2-u globulin                                           | M27434    | 4.5  |
| alpha-1-acid glycoprotein                                    | V01216    | 4.2  |
| vitronectin                                                  | U44845    | 2.1  |
| <b>Secreted Protein (Extracellular Matrix Protein)</b>       |           |      |
| Metallothionein                                              | AI176456  | 2.3  |
| <b>Transport</b>                                             |           |      |
| transferrin                                                  | D38380    | 4.3  |
| <b>Other</b>                                                 |           |      |
| Nclone10                                                     | U31866    | 4.3  |
